# Supplementary material for: Ligand substitution reactions of the CpMn(CO)2(cyclohexane) intermediate studied by time-resolved infrared absorption spectroscopyElectronic supplementary information (ESI) available: Complete tables of pseudo-first order rate constants kobs as a function of [L] and of temperature. See http://www.rsc.org/suppdata/dt/b3/b302023a/
Source: Royal Society of Chemistry journal article supplement (doi:10.1039/b302023a), 2003-01-01
Supplement: b302023a.pdf [file b302023a.pdf]

*Electronic Supplementary Information*

**Ligand Substitution Reactions of the CpMn(CO)<sub>2</sub>(Cyclohexane)  
Intermediate Studied by Time-Resolved Infrared Absorption  
Spectroscopy**

S. Lugovskoy, J. Lin, and Richard H. Schultz\*

*Department of Chemistry, Bar-Ilan University, Ramat-Gan 52900, Israel*

*E-mail: schultr@mail.biu.ac.il*

**Table S1. Pseudo-first order reaction rate constants for reaction of CpMn(CO)<sub>2</sub>(CyH) with THF.<sup>a</sup>**

| [THF],<br>mol L <sup>-1</sup> | <i>k</i> <sub>obs</sub> , 10 <sup>6</sup> s <sup>-1</sup> |               |               |               |              |
|-------------------------------|-----------------------------------------------------------|---------------|---------------|---------------|--------------|
|                               | 20 °C                                                     | 30 °C         | 40 °C         | 50 °C         | 60 °C        |
| 0.100                         | 0.154 (0.004)                                             | 0.253 (0.001) | 0.357 (0.008) | 0.575 (0.009) | 0.811 (0.02) |
| 0.101                         | 0.192 (0.010)                                             | 0.252 (0.001) | 0.359 (0.003) | 0.479 (0.018) | 0.654 (0.02) |
| 0.199                         | 0.279 (0.004)                                             | 0.405 (0.012) | 0.628 (0.055) | 1.04 (0.07)   | 1.28 (0.09)  |
| 0.200                         | 0.273 (0.007)                                             | 0.470 (0.011) | 0.743 (0.014) | 1.07 (0.02)   | 1.61 (0.04)  |
| 0.500                         | 0.695 (0.039)                                             | 1.02 (0.03)   | 1.58 (0.03)   | 2.38 (0.09)   | 3.34 (0.30)  |
| 0.500                         | 0.668 (0.012)                                             | 1.07 (0.02)   | 1.61 (0.03)   | 2.59 (0.07)   | —            |
| 0.800                         | 1.20 (0.04)                                               | 1.60 (0.04)   | 2.38 (0.07)   | 3.69 (0.26)   | 5.24 (0.15)  |
| 0.800                         | 1.07 (0.04)                                               | 1.53 (0.04)   | 2.58 (0.06)   | 3.57 (0.20)   | 5.32 (0.31)  |
| 1.00                          | 1.35 (0.08)                                               | 1.86 (0.06)   | 2.77 (0.33)   | 4.25 (0.58)   | 6.22 (0.34)  |
| 1.00                          | 1.32 (0.03)                                               | 1.94 (0.06)   | 2.71 (0.26)   | 4.46 (0.65)   | —            |
| 1.20                          | 1.66 (0.04)                                               | 2.24 (0.06)   | 3.04 (0.24)   | 5.36 (0.30)   | —            |
| 1.205                         | 1.62 (0.13)                                               | 2.32 (0.14)   | 3.15 (0.24)   | 5.37 (0.34)   | —            |
| 1.412                         | 1.75 (0.09)                                               | 2.56 (0.14)   | 3.88 (0.28)   | 5.96 (0.29)   | —            |
| 1.60                          | 2.09 (0.03)                                               | 3.19 (0.12)   | 3.69 (0.30)   | —             | —            |
| 1.60                          | 1.90 (0.08)                                               | —             | 3.85 (0.47)   | —             | —            |
| 1.80                          | —                                                         | 3.85 (0.34)   | 4.37 (0.28)   | —             | —            |
| 1.801                         | —                                                         | —             | 4.42 (0.33)   | —             | —            |

<sup>a</sup>1σ uncertainties given in parentheses.

**Table S2. Pseudo-first order reaction rate constants for reaction of CpMn(CO)<sub>2</sub>(CyH) with furan.<sup>a</sup>**

| [Furan],<br>mol L <sup>-1</sup> | <i>k</i> <sub>obs</sub> , 10 <sup>5</sup> s <sup>-1</sup> |               |               |               |             |             |
|---------------------------------|-----------------------------------------------------------|---------------|---------------|---------------|-------------|-------------|
|                                 | 15 °C                                                     | 20 °C         | 25 °C         | 35 °C         | 45 °C       | 55 °C       |
| 0.022                           | 0.228 (0.003)                                             | 0.310 (0.004) | 0.401 (0.006) | 0.572 (0.041) | —           | —           |
| 0.057                           | 0.423 (0.003)                                             | 0.595 (0.009) | 0.704 (0.011) | 1.27 (0.02)   | 2.03 (0.03) | 3.10 (0.06) |
| 0.103                           | 0.788 (0.008)                                             | 1.00 (0.03)   | 1.27 (0.07)   | 2.09 (0.09)   | 3.61 (0.13) | 4.62 (0.27) |
| 0.203                           | 1.51 (0.02)                                               | 1.72 (0.02)   | 2.22 (0.04)   | 3.55 (0.13)   | 6.46 (0.19) | 8.63 (0.32) |
| 0.403                           | 2.44 (0.03)                                               | 3.12 (0.11)   | 3.83 (0.12)   | —             | 10.5 (0.4)  | 15.6 (0.9)  |
| 0.640                           | 3.84 (0.09)                                               | 5.57 (0.01)   | 6.69 (0.43)   | 12.3 (0.4)    | 17.3 (1.2)  | 24.7 (2.2)  |
| 0.830                           | 4.90 (0.21)                                               | 6.57 (0.33)   | 9.02 (0.47)   | 14.6 (0.4)    | 21.8 (1.0)  | 31.7 (2.4)  |
| 1.09                            | 6.35 (0.56)                                               | 8.55 (0.65)   | 10.6 (0.6)    | 19.8 (1.9)    | 25.7 (3.8)  | 39.1 (4.8)  |
| 1.11                            | 6.81 (0.21)                                               | —             | 12.8 (0.5)    | 20.7 (0.8)    | 27.2 (1.1)  | 39.4 (1.4)  |
| 1.28                            | 8.02 (0.50)                                               | 10.9 (0.9)    | 13.5 (1.2)    | 22.7 (0.2)    | 34.0 (2.8)  | 45.8 (6.7)  |
| 1.49                            | 10.1 (0.8)                                                | 12.2 (0.95)   | 15.2 (0.2)    | —             | —           | —           |

<sup>a</sup>1σ uncertainties in parentheses.

**Table S3. Pseudo-first order reaction rate constants for reaction of CpMn(CO)<sub>2</sub>(CyH) with pyrrolidine.<sup>a</sup>**

| [pyrrolidine],<br>mol L <sup>-1</sup> | <i>k</i> <sub>obs</sub> , 10 <sup>6</sup> s <sup>-1</sup> |               |               |               |               |               |
|---------------------------------------|-----------------------------------------------------------|---------------|---------------|---------------|---------------|---------------|
|                                       | 15 °C                                                     | 20 °C         | 25 °C         | 35 °C         | 45 °C         | 55 °C         |
| 0.022                                 | 0.044 (0.002)                                             | 0.066 (0.002) | 0.092 (0.002) | 0.147 (0.004) | 0.257 (0.006) | 0.339 (0.009) |
| 0.053                                 | 0.151 (0.008)                                             | 0.162 (0.014) | 0.204 (0.002) | 0.307 (0.005) | 0.475 (0.008) | 0.719 (0.008) |
| 0.100                                 | 0.225 (0.001)                                             | 0.271 (0.016) | 0.334 (0.002) | 0.551 (0.003) | 0.805 (0.007) | 1.20 (0.01)   |
| 0.230                                 | 0.479 (0.010)                                             | 0.562 (0.008) | 0.686 (0.008) | 1.18 (0.03)   | 1.74 (0.03)   | 2.79 (0.01)   |
| 0.400                                 | 0.627 (0.010)                                             | 0.848 (0.015) | 1.16 (0.03)   | 1.84 (0.06)   | 2.97 (0.01)   | 4.42 (0.02)   |
| 0.500                                 | 0.766 (0.034)                                             | 0.967 (0.034) | 1.30 (0.05)   | 2.40 (0.09)   | 4.13 (0.30)   | 6.17 (0.04)   |
| 0.600                                 | 0.837 (0.068)                                             | 1.08 (0.05)   | 1.44 (0.07)   | 2.85 (0.02)   | 4.32 (0.58)   | 7.40 (1.31)   |
| 0.810                                 | 1.08 (0.74)                                               | 1.57 (0.15)   | 2.04 (0.12)   | 3.54 (0.19)   | 6.18 (0.36)   | —             |
| 0.998                                 | 1.54 (2.76)                                               | 1.98 (0.27)   | 2.60 (0.15)   | 4.16 (0.39)   | —             | —             |
| 1.50                                  | 2.33 (0.40)                                               | 2.96 (0.53)   | 3.46 (0.45)   | —             | —             | —             |

<sup>a</sup>1σ uncertainties in parentheses.

**Table S4. Pseudo-first order reaction rate constants for reaction of CpMn(CO)<sub>2</sub>(CyH) with cyclopentene.<sup>a</sup>**

| [cyclopentene],<br>mol L <sup>-1</sup> | <i>k</i> <sub>obs</sub> , 10 <sup>6</sup> s <sup>-1</sup> |                 |                 |                 |                 |               |
|----------------------------------------|-----------------------------------------------------------|-----------------|-----------------|-----------------|-----------------|---------------|
|                                        | 15 °C                                                     | 20 °C           | 25 °C           | 35 °C           | 45 °C           | 55 °C         |
| 0.020                                  | 0.0131 (0.0002)                                           | 0.0215 (0.0005) | 0.0249 (0.0005) | 0.0431 (0.0006) | 0.0747 (0.0011) | 0.119 (0.002) |
| 0.0508                                 | 0.0296 (0.0006)                                           | 0.0405 (0.0009) | 0.0505 (0.0011) | 0.0849 (0.0026) | 0.148 (0.005)   | 0.236 (0.005) |
| 0.10                                   | 0.0462 (0.0008)                                           | 0.0692 (0.0014) | 0.0823 (0.0035) | 0.150 (0.003)   | 0.234 (0.010)   | 0.451 (0.005) |
| 0.30                                   | 0.174 (0.017)                                             | 0.221 (0.005)   | 0.281 (0.007)   | 0.457 (0.011)   | —               | —             |
| 0.50                                   | 0.247 (0.005)                                             | 0.399 (0.004)   | 0.469 (0.004)   | 0.827 (0.008)   | 1.35 (0.01)     | 2.15 (0.05)   |
| 1.00                                   | 0.476 (0.008)                                             | 0.649 (0.008)   | 0.791 (0.016)   | 1.48 (0.03)     | 2.21 (0.06)     | 3.71 (0.10)   |
| 1.50                                   | 0.694 (0.010)                                             | 0.935 (0.015)   | 1.24 (0.02)     | 2.10 (0.05)     | 3.34 (0.09)     | 5.37 (0.43)   |
| 2.00                                   | 0.976 (0.027)                                             | 1.27 (0.03)     | 1.73 (0.08)     | 2.86 (0.10)     | 4.80 (0.16)     | 7.46 (0.38)   |
| 2.50                                   | 1.04 (0.02)                                               | 1.62 (0.03)     | 2.25 (0.05)     | 3.45 (0.10)     | 5.65 (0.18)     | —             |
| 3.00                                   | 1.37 (0.045)                                              | 1.87 (0.05)     | 2.51 (0.08)     | —               | 6.70 (0.35)     | —             |
| 4.00                                   | 1.92 (0.13)                                               | —               | 3.48 (0.27)     | —               | —               | —             |
| 5.00                                   | 2.23 (0.24)                                               | —               | 4.34 (0.46)     | —               | —               | —             |
| 6.00                                   | 2.36 (0.28)                                               | —               | 4.98 (0.46)     | —               | —               | —             |
